# Supplementary material for: Accumulation of zinc, copper, or cerium in carrot (Daucus carota) exposed to metal oxide nanoparticles and metal ions
Source: Royal Society of Chemistry journal article supplement (doi:10.1039/c5en00161g), 2015-10-16
Supplement: c5en00161g1.pdf [file c5en00161g1.pdf]

**Figure S1.** Schematic diagram of the anatomy of a developed taproot of carrot (*Daucus carota*).

The increase in diameter of the carrot taproot during development is due to secondary growth from the mitotic activity of the cambium cell layers. There are two cambium cell layers, an inner vascular cambium layer and an outer cork cambium layer. At the center of the carrot taproot is a very small pithlike area (Figure S1). Surrounding the central pith are (in order moving radially outwards) the layers of the secondary xylem, the vascular cambium and the secondary phloem. The vascular cambium layer produces secondary xylem to the inside of cambium and secondary phloem to the outside. The secondary xylem and pith form the core of the carrot taproot. The secondary xylem and the secondary phloem together account for the vast majority of the taproot diameter, with the latter the larger of the two cell layers. Most of the carrot “flesh” in this study would be comprised of the secondary xylem and phloem. Xylem rays, if present, are additional secondary xylem cells organized radially across the taproot.

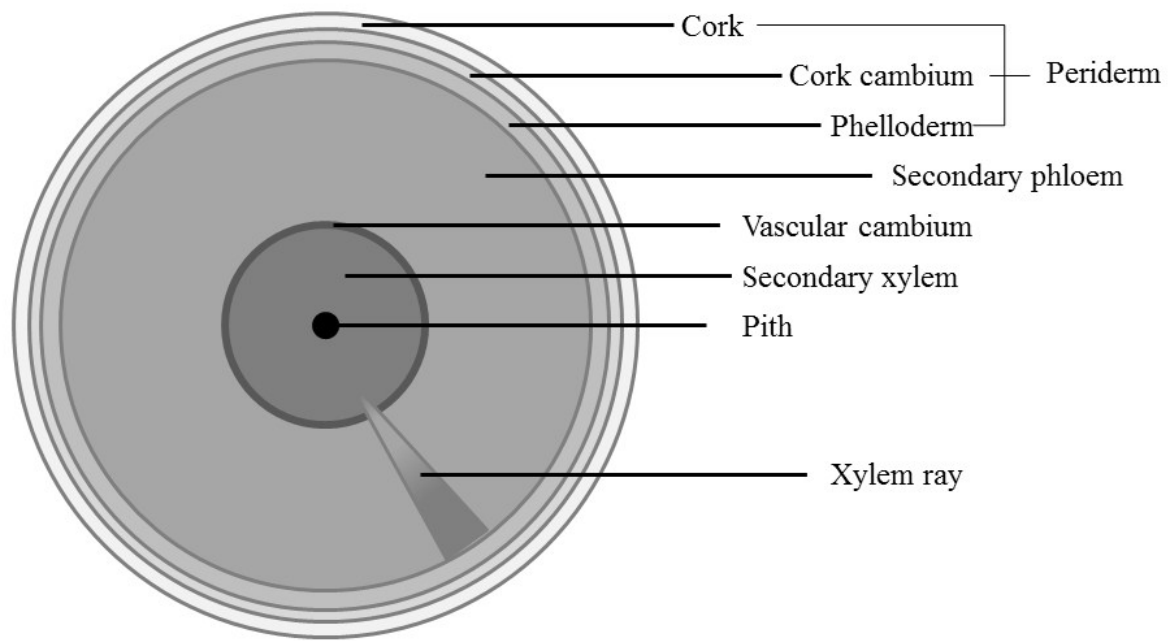

Figure S1

**Table S1.** Hydrodynamic size for the ZnO, CuO, or CeO<sub>2</sub> nanoparticle suspensions prepared at 1, 10, 100, or 1,000 mg L<sup>-1</sup> of total Zn, Cu, or Ce respectively. Data represent the mean and standard error ( $n=3$ ).

| Nanoparticle     | Concentration (mg L <sup>-1</sup> ) | Hydrodynamic size   |
|------------------|-------------------------------------|---------------------|
| ZnO              | 1                                   | 1,162.7 $\pm$ 347.1 |
|                  | 10                                  | 2,140.0 $\pm$ 241.5 |
|                  | 100                                 | 1,519.7 $\pm$ 64.8  |
|                  | 1,000                               | 1,694.0 $\pm$ 75.5  |
| CuO              | 1                                   | 402.0 $\pm$ 20.5    |
|                  | 10                                  | 407.0 $\pm$ 8.6     |
|                  | 100                                 | 339.4 $\pm$ 2.1     |
|                  | 1,000                               | 1,267.3 $\pm$ 121.2 |
| CeO <sub>2</sub> | 1                                   | 280.3 $\pm$ 16.0    |
|                  | 10                                  | 259.8 $\pm$ 17.9    |
|                  | 100                                 | 255.9 $\pm$ 1.4     |
|                  | 1,000                               | 250.2 $\pm$ 4.7     |

**Table S2.** The p-values for the two-way ANOVA analysis of the measured biomass parameters and root:shoot ratios.

| Element and parameter | Form         | Concentration    | Form x Concentration |
|-----------------------|--------------|------------------|----------------------|
| Zinc                  |              |                  |                      |
| Shoot mass            | n.s.         | n.s.             | n.s.                 |
| Root mass             | n.s.         | <b>0.020</b>     | n.s.                 |
| Total mass            | n.s.         | <b>0.028</b>     | n.s.                 |
| Root:shoot ratio      | n.s.         | n.s.             | n.s.                 |
| Copper                |              |                  |                      |
| Shoot mass            | <b>0.037</b> | <b>0.015</b>     | n.s.                 |
| Root mass             | n.s.         | n.s.             | n.s.                 |
| Total mass            | n.s.         | <b>0.014</b>     | <b>0.037</b>         |
| Root:shoot ratio      | n.s.         | n.s.             | n.s.                 |
| Cerium                |              |                  |                      |
| Shoot mass            | <b>0.006</b> | <b>&lt;0.001</b> | <b>&lt;0.001</b>     |
| Root mass             | n.s.         | n.s.             | n.s.                 |
| Total mass            | n.s.         | <b>0.039</b>     | n.s.                 |
| Root:shoot ratio      | <b>0.020</b> | n.s.             | <b>0.010</b>         |

n.s. = not significant

**Table S3.** The p-values for the three-way ANOVA analysis of taproot tissue concentration and bioconcentration factor (BCF) and the two-way ANOVA analysis of shoot tissue concentration, bioconcentration factor, transfer factor (TF), and whole plant total metal removal. Tissue was included as a main effect for taproots because the peel and flesh tissues were analyzed separately.

| Element and parameter      | Form   | Concentration | Tissue | Form x<br>Concentration | Form x<br>Tissue | Tissue x<br>Concentration | Form x Tissue x<br>Concentration |
|----------------------------|--------|---------------|--------|-------------------------|------------------|---------------------------|----------------------------------|
| Zinc                       |        |               |        |                         |                  |                           |                                  |
| Root tissue concentration  | n.s.   | <0.001        | 0.001  | 0.023                   | 0.027            | <0.001                    | 0.005                            |
| Root tissue BCF            | 0.01   | <0.001        | 0.002  | 0.003                   | n.s.             | <0.001                    | 0.017                            |
| Shoot tissue concentration | <0.001 | <0.001        | --     | <0.001                  | --               | --                        | --                               |
| Shoot tissue BCF           | 0.04   | <0.001        | --     | n.s.                    | --               | --                        | --                               |
| Shoot tissue TF            | <0.001 | <0.001        | --     | <0.001                  | --               | --                        | --                               |
| Total metal removal        | <0.001 | 0.004         | --     | 0.006                   |                  |                           |                                  |
| Copper                     |        |               |        |                         |                  |                           |                                  |
| Root tissue concentration  | <0.001 | <0.001        | <0.001 | <0.001                  | <0.001           | <0.001                    | <0.001                           |
| Root tissue BCF            | 0.038  | <0.001        | <0.001 | n.s.                    | n.s.             | <0.001                    | n.s.                             |
| Shoot tissue concentration | <0.001 | <0.001        | --     | <0.001                  | --               | --                        | --                               |
| Shoot tissue BCF           | 0.012  | <0.001        | --     | 0.044                   | --               | --                        | --                               |
| Shoot tissue TF            | n.s.   | n.s.          | --     | n.s.                    | --               | --                        | --                               |
| Total metal removal        | n.s.   | <0.001        | --     | n.s.                    | --               | --                        | --                               |
| Cerium                     |        |               |        |                         |                  |                           |                                  |
| Root tissue concentration  | <0.001 | <0.001        | <0.001 | <0.001                  | <0.001           | <0.001                    | <0.001                           |
| Root tissue BCF            | <0.001 | <0.001        | <0.001 | n.s.                    | <0.001           | <0.001                    | n.s.                             |
| Shoot tissue concentration | <0.001 | <0.001        | --     | <0.001                  | --               | --                        | --                               |
| Shoot tissue BCF           | <0.001 | <0.001        | --     | n.s.                    | --               | --                        | --                               |
| Shoot tissue TF            | n.s.   | n.s.          | --     | 0.047                   | --               | --                        | --                               |
| Total metal removal        | <0.001 | <0.001        | --     | n.s.                    | --               | --                        | --                               |

n.s. = not significant
